# Supplementary material for: Intrapulmonary and Systemic Pharmacokinetics of Colistin Following Nebulization of Low-Dose Colistimethate Sodium in Patients with Ventilator-Associated Pneumonia Caused by Carbapenem-Resistant Acinetobacter baumannii
Source: MDPI journal article supplement (doi:10.3390/antibiotics13030258), 2024-03-14
Supplement: s1 [file s1]

## Supplementary Materials

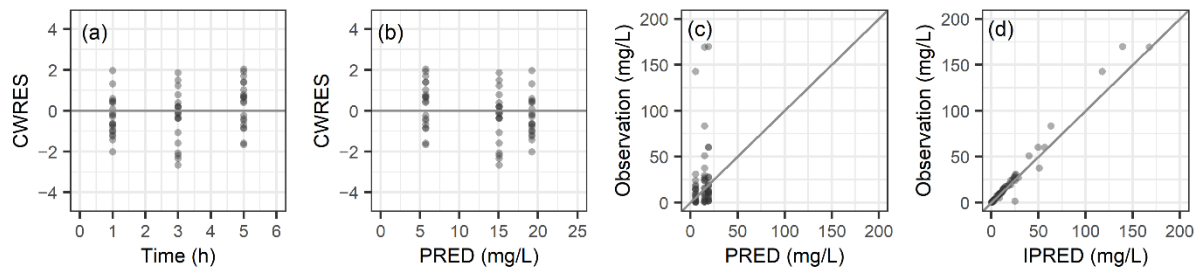

**Figure S1.** Goodness-of-fit plots for the final PK models of colistin in epithelial lining fluid: (a) conditional weighted residuals (CWRES) versus time, (b) CWRES versus population predicted concentration (PRED), (c) observed concentration versus PRED, and (d) observed concentration versus individual predicted concentration (IPRED).

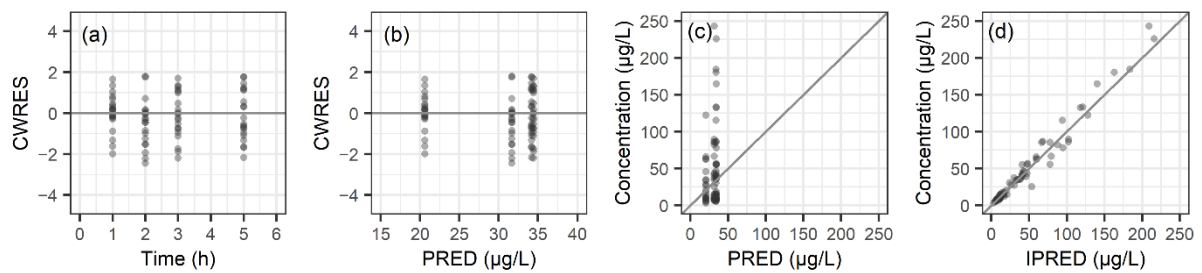

**Figure S2.** Goodness-of-fit plots for the final PK models of colistin in plasma: (a) conditional weighted residuals (CWRES) versus time, (b) CWRES versus population predicted concentration (PRED), (c) observed concentration versus PRED, and (d) observed concentration versus individual predicted concentration (IPRED).

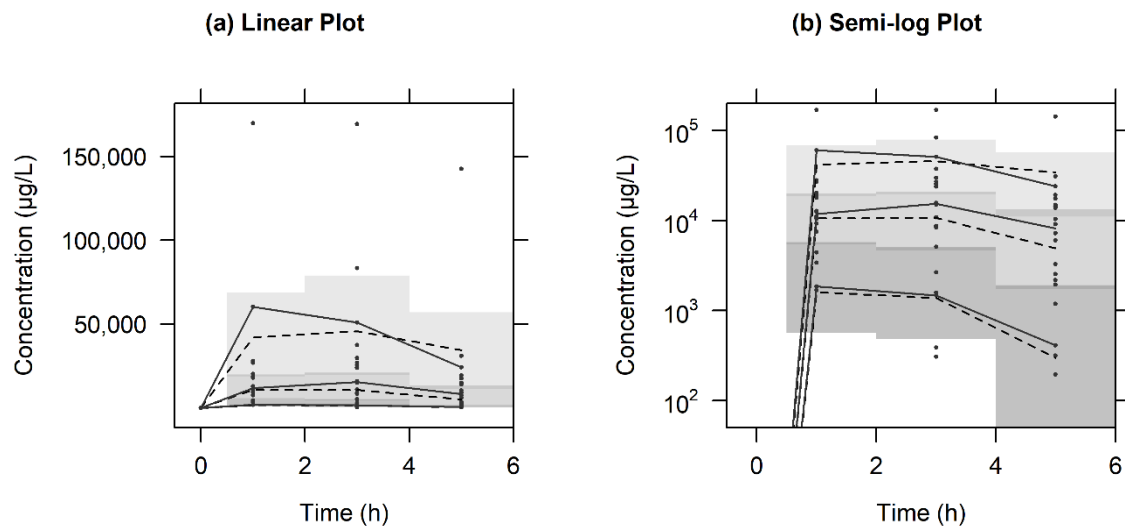

**Figure S3.** Visual predictive check for the final PK models of colistin in epithelial lining fluid, (a) linear plot (b) semi-log plot: closed circles, observed concentrations; solid lines, 10th, 50th, and 90th percentiles of observations; dashed lines, 10th, 50th, and 90th percentiles of simulated concentrations; shaded areas, 95% confidence intervals for the 10th, 50th, and 90th percentiles of simulated concentrations.

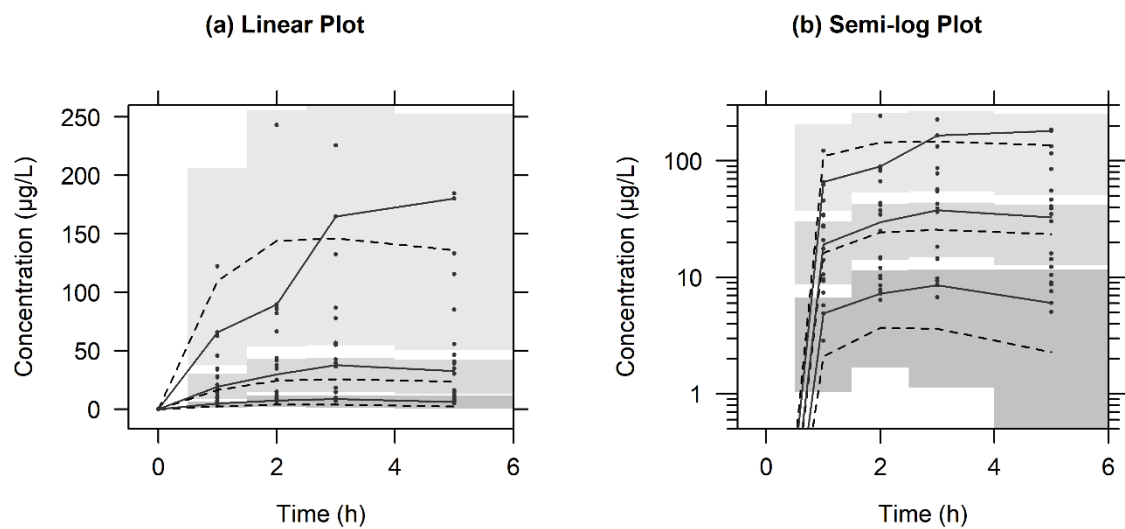

**Figure S4.** Visual predictive check for the final PK models of colistin in plasma, (a) linear plot (b) semi-log plot: closed circles, observed concentrations; solid lines, 10th, 50th, and 90th percentiles of observations; dashed lines, 10th, 50th, and 90th percentiles of simulated concentrations; shaded areas, 95% confidence intervals for the 10th, 50th, and 90th percentiles of simulated concentrations.
